# Supplementary material for: Genome-wide analysis of myxobacterial two-component systems: genome relatedness and evolutionary changes
Source: PubMed Central journal article supplement (PMC4603909; doi:10.1186/s12864-015-2018-y), 2015-10-13
Supplement: 12864_2015_2018_MOESM2_ESM.pdf [file 12864_2015_2018_MOESM2_ESM.pdf]

a:

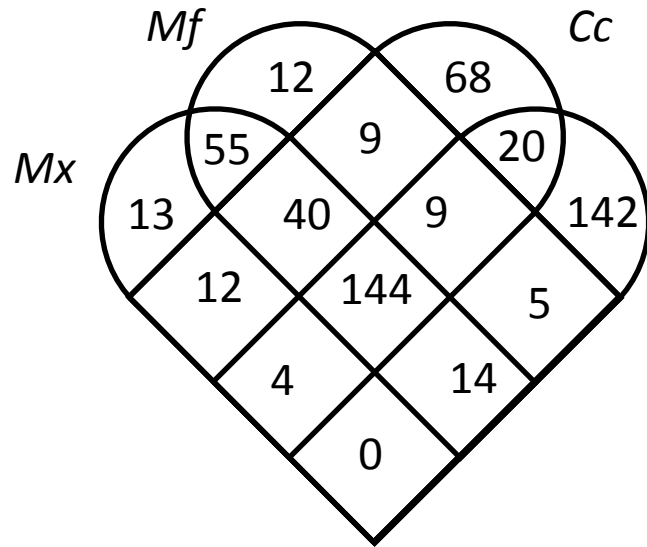

b:

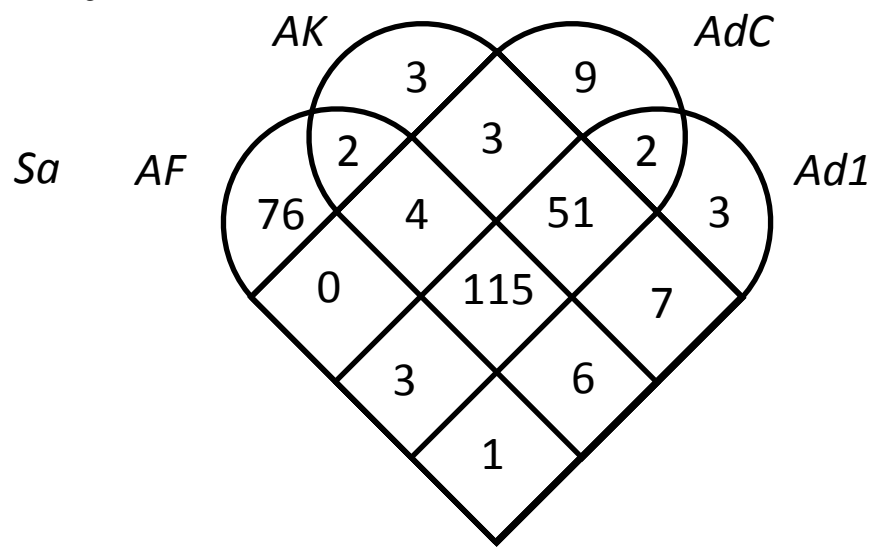

Additional Figure 2
