# Supplementary material for: Genome-wide analysis of myxobacterial two-component systems: genome relatedness and evolutionary changes
Source: PubMed Central journal article supplement (PMC4603909; doi:10.1186/s12864-015-2018-y), 2015-10-13
Supplement: 12864_2015_2018_MOESM4_ESM.pdf [file 12864_2015_2018_MOESM4_ESM.pdf]

|                            |  |  |  |  |  |  |  |  |              |      |
|----------------------------|--|--|--|--|--|--|--|--|--------------|------|
| R, T, T, RR, R<br>T, T, RR |  |  |  |  |  |  |  |  | 8796<br>5168 |      |
| TR, R, RRRT                |  |  |  |  |  |  |  |  |              | 2367 |
| RTRR, T                    |  |  |  |  |  |  |  |  |              | 1854 |
| TR, RT                     |  |  |  |  |  |  |  |  |              | 0803 |
| TRT, TR                    |  |  |  |  |  |  |  |  |              | 0539 |

**Additional Table 1: Intricate multi-gene TCS foci.** Each row shows all myxobacterial orthologues of intricate multi-gene foci, including non-intricate orthologues, arranged by organism. Foci in particular genomes are denoted by the number from the locus tag of the first protein within the focus. ‘//’ refers to an unspecified number (2 or more) of non-TCS genes.
