# Supplementary material for: Genome-wide analysis of myxobacterial two-component systems: genome relatedness and evolutionary changes
Source: PubMed Central journal article supplement (PMC4603909; doi:10.1186/s12864-015-2018-y), 2015-10-13
Supplement: 12864_2015_2018_MOESM5_ESM.pdf [file 12864_2015_2018_MOESM5_ESM.pdf]

| Organism   | TCS Genes | Singletons | Singletons acquired by HGT | Genes found within entire foci acquired by HGT | HGT foci containing 'intact' TCS. |
|------------|-----------|------------|----------------------------|------------------------------------------------|-----------------------------------|
| <i>AdI</i> | 188       | 2          | 1                          | 1                                              | 0                                 |
| <i>AdC</i> | 187       | 8          | 6                          | 6                                              | 1                                 |
| <i>AK</i>  | 191       | 3          | 3                          | 3                                              | 2                                 |
| <i>AF</i>  | 207       | 65         | 24                         | 20                                             | 15                                |
| <i>Sa</i>  | 338       | 124        | 22                         | 18                                             | 13                                |
| <i>Cc</i>  | 306       | 56         | 12                         | 9                                              | 5                                 |
| <i>Mx</i>  | 282       | 13         | 7                          | 7                                              | 6                                 |
| <i>Mf</i>  | 288       | 10         | 2                          | 1                                              | 0                                 |
| TOTAL      | 1987      | 281        | 77                         | 65                                             | 42                                |

**Additional Table 2. Evidence of horizontal gene transfer (HGT) amongst cystobacterial TCS proteins.** Singletons (TCS lacking orthologues) from comparisons between *AdI/AdC/AK/AF*, and between *Mx/Mf/Cc/Sa*, are presented alongside the number of singletons acquired by HGT (as evidenced by highest-scoring BLAST hits to non-myxobacteria outside the organism's own genus). Also tabulated are the number of TCS genes found in foci where every TCS gene was acquired by putative HGT and the number of those which constitute an 'intact' TCS (ie containing  $\geq 1$  transmitter domain and  $\geq 1$  receiver domain).
